# Supplementary material for: Decreased Plasma Hydrogen Sulfide Level Is Associated With the Severity of Depression in Patients With Depressive Disorder
Source: Frontiers journal article supplement (doi:10.3389/fpsyt.2021.765664), 2021-11-11
Supplement: Presentation_1.PDF [file Presentation_1.PDF]

**Decreased plasma hydrogen sulfide level is associated with the  
severity of depression in patients with depressive disorder**

Supplementary materials

**Supplementary Table 1 Hamilton Rating Scale for Depression (HAM-D-17)**

| Item No.         | Symptom                           | Score Range | Score |
|------------------|-----------------------------------|-------------|-------|
| 1                | Depressed mood                    | 0-4         |       |
| 2                | Feelings of guilt                 | 0-4         |       |
| 3                | Suicide                           | 0-4         |       |
| 4                | Early insomnia                    | 0-2         |       |
| 5                | Middle insomnia                   | 0-2         |       |
| 6                | Late insomnia                     | 0-2         |       |
| 7                | Work and activities               | 0-4         |       |
| 8                | Retardation                       | 0-4         |       |
| 9                | Agitation                         | 0-4         |       |
| 10               | Psychic anxiety                   | 0-4         |       |
| 11               | Somatic anxiety                   | 0-4         |       |
| 12               | Gastrointestinal somatic symptoms | 0-2         |       |
| 13               | General somatic symptoms          | 0-2         |       |
| 14               | Genital symptoms                  | 0-2         |       |
| 15               | Hypochondriasis                   | 0-4         |       |
| 16               | Loss of weight                    | 0-2         |       |
| 17               | Insight                           | 0-2         |       |
| Total HRSD score |                                   |             |       |

| Grading |   |                    |
|---------|---|--------------------|
| 0-4     | 0 | Absent             |
|         | 1 | Mild or trivial    |
|         | 2 | Moderate           |
|         | 3 |                    |
|         | 4 | Severe             |
| 0-2     | 0 | Absent             |
|         | 1 | Slight or doubtful |
|         | 2 | Clearly present    |

**Reference:**

Hamilton, M. (1960). A rating scale for depression. *J Neurol Neurosurg Psychiatry* 23, 56-62.

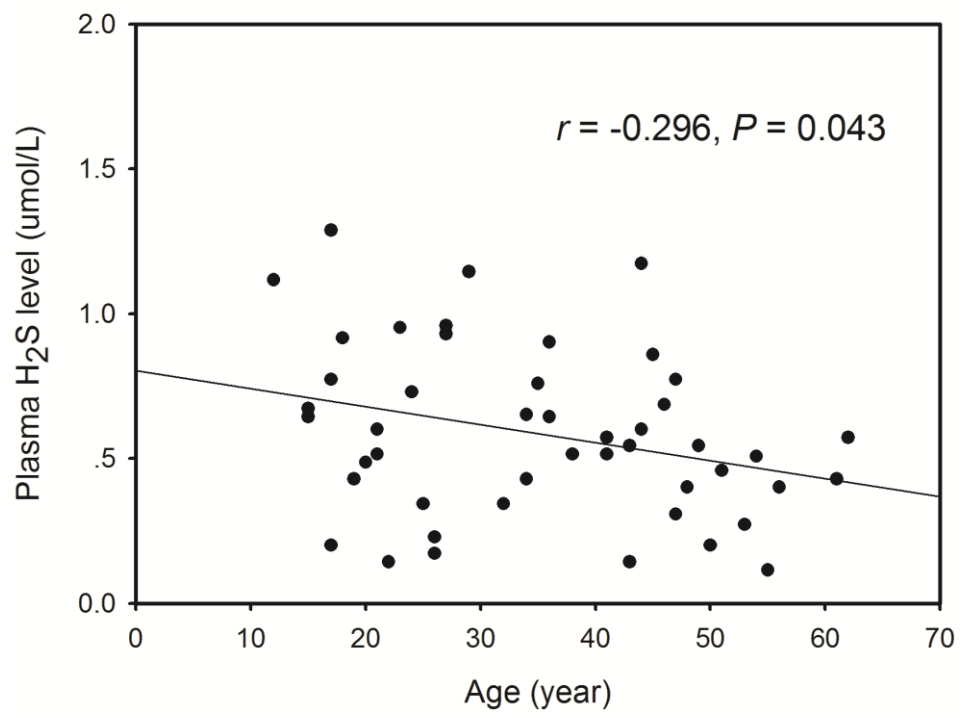

**Supplementary Figure 1** The correlation between plasma H<sub>2</sub>S level and age in patients with depression.
